# Supplementary material for: Further evidence from DNAH12 supports favorable fertility outcomes of infertile males with dynein axonemal heavy chain gene family variants
Source: PubMed Central journal article supplement — iScience. 2024 Jun 24;27(7):110366. doi: 10.1016/j.isci.2024.110366 (PMC11278020; doi:10.1016/j.isci.2024.110366), 2024-06-24
Supplement: mmc1.pdf [file mmc1.pdf]

**Supplemental information**

**Further evidence from *DNAH12* supports favorable  
fertility outcomes of infertile males with dynein  
axonemal heavy chain gene family variants**

**Hao Geng, Kai Wang, Dan Liang, Xiaoqing Ni, Hui Yu, Dongdong Tang, Mingrong Lv, Huan Wu, Kuokuo Li, Qunshan Shen, Yang Gao, Chuan Xu, Ping Zhou, Zhaolian Wei, Yunxia Cao, Yanwei Sha, Xiaoyu Yang, and Xiaojin He**

**Figure S1. Expression levels of mRNA and proteins in spermatozoa from NC and patients harboring biallelic variants of *DNAH12*, related to Figure 3.**

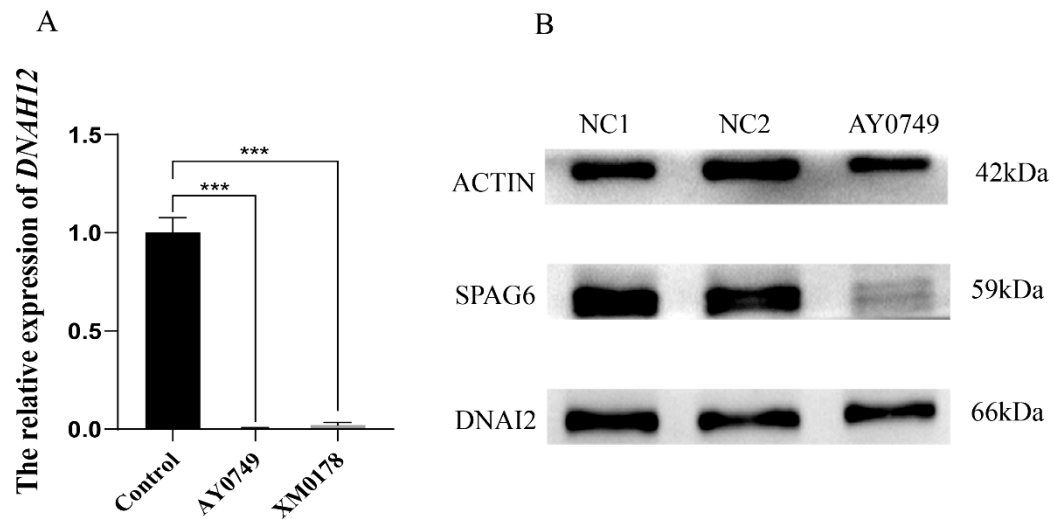

(A) Relative expression of *DNAH12* mRNA in spermatozoa from NC and proband AY0749 and XM0178. The significance was determined via one-way ANOVA followed by Dunnett's test,  $***p < 0.001$ . (B) Expression of SPAG6 and DNAI2 in spermatozoa from NC and proband AY0749.

**Figure S2. The blastocyst was successfully generated following intracytoplasmic sperm injection (ICSI) with spermatozoa both from *Dnah12*<sup>-/-</sup> and WT male mice, related to Table 1.**

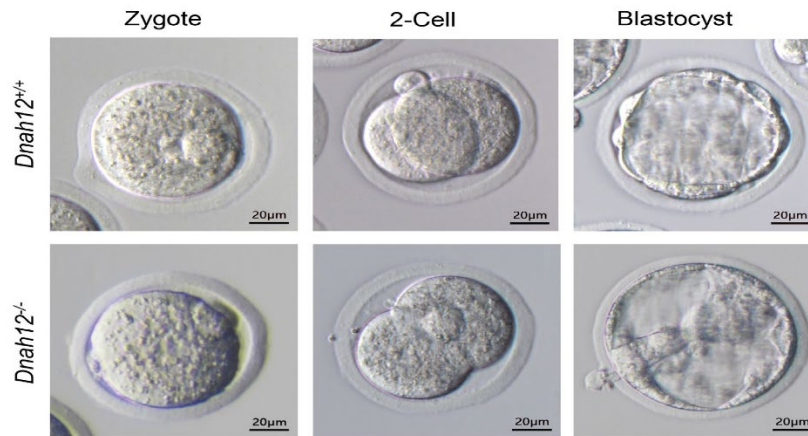

|                               | <i>Dnah12</i> <sup>-/-</sup> | WT           |
|-------------------------------|------------------------------|--------------|
| No. of oocytes injected       | 8                            | 15           |
| Fertilization rate (%)        | 75.0 (6/8)                   | 93.3 (14/15) |
| Cleavage rate (%)             | 67.5 (5/8)                   | 86.7 (13/15) |
| 8-Cell formation rate (%)     | 37.5 (3/8)                   | 66.7 (10/15) |
| Blastocyst formation rate (%) | 12.5 (1/8)                   | 40.0 (6/15)  |

**Figure S3. Flowchart of variants filtration and selection strategy, related to STAR**

**Methods.**

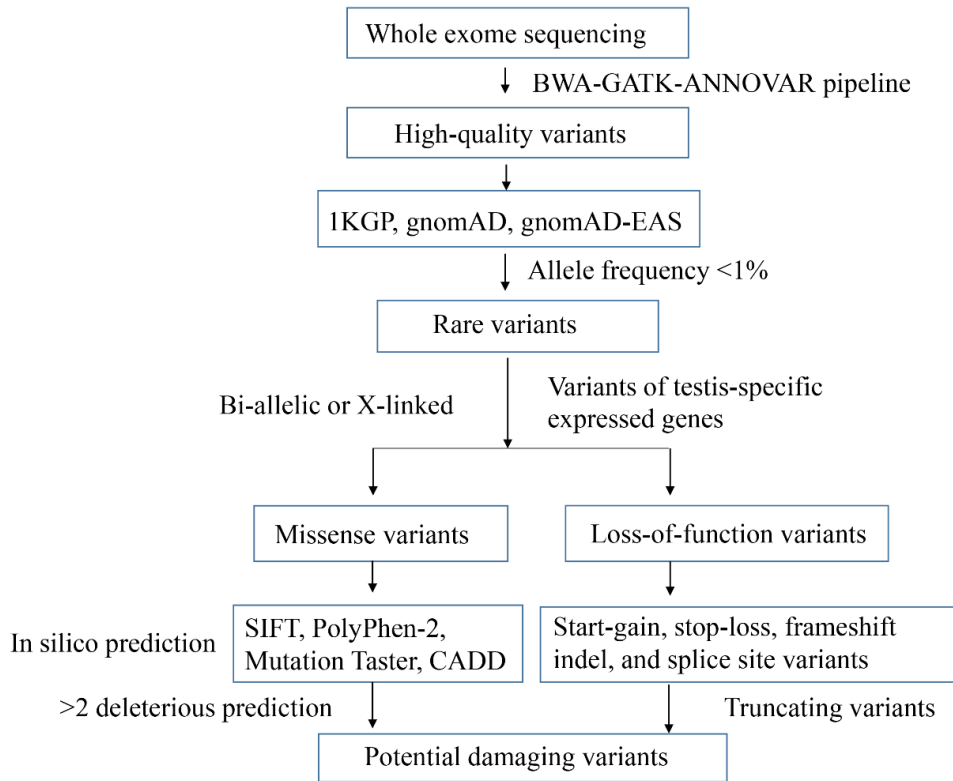

**Table S1. Demographic characteristics of infertile males harboring biallelic *DNAH12* variants, related to Figure 2.**

| Subject    | AY0749      | NJ0278      | XM0178      |
|------------|-------------|-------------|-------------|
| Sex        | Male        | Male        | Male        |
| Age(years) | 31          | 41          | 33          |
| Ancestry   | East Asian  | East Asian  | East Asian  |
| Ethnicity  | Han Chinese | Han Chinese | Han Chinese |

**Table S3. Semen characteristics and sperm morphology in men harboring biallelic *DNAH12* variants, related to Figure 3.**

| Subject                             | AY0749 |      | NJ0278 |      | XM0178 |      | Reference Values   |
|-------------------------------------|--------|------|--------|------|--------|------|--------------------|
| <b>Semen Parameter</b>              |        |      |        |      |        |      |                    |
| Semen volume (mL)                   | 3.4    | 2.8  | 6.0    | 3.5  | 3.0    | 3.4  | >1.5 <sup>a</sup>  |
| Concentration (10 <sup>6</sup> /mL) | 23.3   | 34.5 | 49.4   | 51.2 | 36.7   | 30.2 | >15.0 <sup>a</sup> |
| Motility (%)                        | 20.7   | 18.5 | 3.1    | 5.0  | 10.9   | 15.6 | >40.0 <sup>a</sup> |
| Progressive motility (%)            | 2.8    | 3.1  | 0.9    | 2.3  | 2.3    | 6.7  | >32.0 <sup>a</sup> |
| <b>Sperm Morphology</b>             |        |      |        |      |        |      |                    |
| Normal head(%)                      | 5      |      | NA     |      | 3.5    |      | >7.0 <sup>b</sup>  |
| Normal flagella (%)                 | 1.9    |      | NA     |      | 30.4   |      | >23.0 <sup>b</sup> |
| Absent flagella (%)                 | 8.8    |      | NA     |      | 0.5    |      | <5.0 <sup>b</sup>  |
| Short flagella (%)                  | 15.2   |      | NA     |      | 38.2   |      | <1.0 <sup>b</sup>  |
| Coiled flagella (%)                 | 58.5   |      | NA     |      | 3.9    |      | <17.0 <sup>b</sup> |
| Angulation (%)                      | 13.2   |      | NA     |      | 15.9   |      | <13.0 <sup>b</sup> |
| Irregular caliber (%)               | 2.4    |      | NA     |      | 11.1   |      | <2.0 <sup>b</sup>  |

<sup>a</sup> According to WHO 5<sup>th</sup> edition standards set the reference limit.

<sup>b</sup> Reference values shown by observation of morphologically abnormal sperm in fertile individuals.

Abbreviations: NA, not available.

**Table S4. Primers used for identifying *Dnah12*<sup>-/-</sup> mice, related to STAR Methods.**

| <b>Primer Names</b> | <b>Primer Sequences (5'-3')</b> | <b>T<sub>m</sub></b> |
|---------------------|---------------------------------|----------------------|
| Dnah12-F1           | AGGAGCATGACAGGAAGAGCTTG         | 65°C                 |
| Dnah12-R1           | TGCACACAATCAAGCTCTGAGC          |                      |
| Dnah12-F2           | TTTAGGCGCTAGACTGAACTGC          | 65°C                 |
| Dnah12-R2           | CTGGTCTCAAACACTACTGTGCAAC       |                      |

**Table S5. Primers used for amplification and verification of *DNAH12* mutations, related to STAR Methods.**

| <b>Primer Names</b> | <b>Primer Sequences (5'-3')</b> | <b>T<sub>m</sub></b> |
|---------------------|---------------------------------|----------------------|
| M1-DNAH12-F         | GATTCAGCTACAAATGAAGAGGTCCTG     | 57°C                 |
| M1-DNAH12-R         | AAGTTGTCTGGAGAGGATCACTGCTA      |                      |
| M2-DNAH12-F         | TCCAGTACTATACACATTCAACCCCAAC    | 57°C                 |
| M2-DNAH12-R         | TCCATTCTGTGCAATCCAGGAA          |                      |
| M3-DNAH12-F         | GCAATGGCGTGATCTTGGCTCTT         | 57°C                 |
| M3-DNAH12-R         | GTGTTTGTTCGCCACGGCG             |                      |
| M4-DNAH12-F         | GGGTCATTCTCTTCATCCTGG           | 57°C                 |
| M4-DNAH12-R         | CTGGGTGAGGAGCAAGGACT            |                      |
| M5-DNAH12-F         | CGATCAATTAAAGATGTAAATGAACC      | 57°C                 |
| M5-DNAH12-R         | TAATAAAGTGGACAAAATAGGGGA        |                      |

**Table S6. Primers used for RT-qPCR assays, related to STAR Methods.**

| <b>Primer Names</b> | <b>Primer Sequences (5'-3')</b> | <b>T<sub>m</sub></b> |
|---------------------|---------------------------------|----------------------|
| DNAH12-F            | AGTCGGATGCCTATGTCTGTC           | 58°C                 |
| DNAH12-R            | TGCCGAGTAGGTTGGTCT              |                      |
| GAPDH-F             | GGAGCGAGATCCCTCCAAAAT           | 58°C                 |
| GAPDH-R             | GGCTGTTGTCATACTTCTCATGG         |                      |
| Dnah12-F            | TCCTGTTGACCATGCTAGCTGA          | 56°C                 |
| Dnah12-R            | AGGCTCTTGAGTAAACGGAAG           |                      |
| Gapdh-F             | AGGTCGGTGTGAACGGATTTG           | 56°C                 |
| Gapdh-R             | TGTAGACCATGTAGTTGAGGTCA         |                      |
